# Supplementary material for: FreeStyle Libre Flash Glucose Monitoring system for people with type 1 diabetes in the UK: a budget impact analysis
Source: PubMed Central journal article supplement — BMJ Open Diabetes Res Care. 2022 Mar 28;10(2):e002580. doi: 10.1136/bmjdrc-2021-002580 (PMC8961112; doi:10.1136/bmjdrc-2021-002580), 2022-03-28
Supplement: bmjdrc-2021-002580supp001.pdf [file bmjdrc-2021-002580supp001.pdf]

## Supplement

**Supplement Table 1: Baseline demographic characteristics of study participants with and without follow-up at 7 months**

|                                                         | <b>Patients with Follow-up</b> | <b>Patients without routine follow-up</b> |
|---------------------------------------------------------|--------------------------------|-------------------------------------------|
| <b>Age (years)</b>                                      | 46.9 ( $\pm$ 15.3)             | 43.9 ( $\pm$ 15)                          |
| <b>Sex, % females</b>                                   | 50%                            | 50.9%                                     |
| <b>Baseline Body Mass Index (BMI)(kg/m<sup>2</sup>)</b> | 26.6 ( $\pm$ 6.04)             | 26.7 ( $\pm$ 6.4)                         |
| <b>Duration of diabetes (years)</b>                     | 25.3 ( $\pm$ 58.4)             | 22.5 ( $\pm$ 45.5)                        |
| <b>Mean pre-FreeStyle Libre system HbA1c (mmol/mol)</b> | 68.1 ( $\pm$ 16.3)             | 71.5 ( $\pm$ 19.5)                        |

## Figures

**Supplement Figure 1: One-way sensitivity analysis of the incremental cost per patient comparing the FreeStyle Libre system to Self-monitoring of blood glucose (SMBG)**

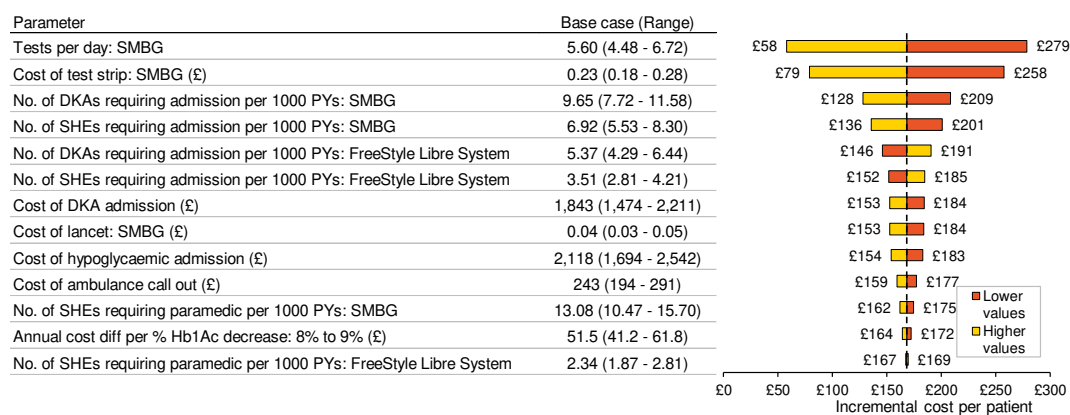

**Supplement Table 2: Sub-group analysis**

|                               | Overall Population     |             |             | High HbA1c baseline    |             |            |
|-------------------------------|------------------------|-------------|-------------|------------------------|-------------|------------|
|                               | FreeStyle Libre system | SMBG        | Difference  | FreeStyle Libre system | SMBG        | Difference |
| Acquisition costs             | £937                   | £552        | £385        | £937                   | £552        | £385       |
| Healthcare resource use costs | £200                   | £396        | -£196       | £200                   | £396        | -£196      |
| Costs avoided due to HbA1c    | -£21                   | £0          | -£21        | -£110                  | £0          | -£110      |
| <b>Total Cost per patient</b> | <b>£1,116</b>          | <b>£948</b> | <b>£168</b> | <b>£1,027</b>          | <b>£948</b> | <b>£79</b> |

Abbreviations: DKA, diabetic ketoacidosis; SHE, severe hypoglycaemic events; QALY, quality adjusted life years; SMBG, self-monitoring blood glucose

\*Includes paramedic call outs and hospital admissions for severe hypoglycaemic, DKA and hyperglycaemic events
