# Supplementary material for: FreeStyle Libre Flash Glucose Monitoring system for people with type 1 diabetes in the UK: a budget impact analysis
Source: PubMed Central journal article supplement — BMJ Open Diabetes Res Care. 2022 Mar 28;10(2):e002580. doi: 10.1136/bmjdrc-2021-002580 (PMC8961112; doi:10.1136/bmjdrc-2021-002580), 2022-03-28

| Parameter                                                            | Base case (Range)     |
|----------------------------------------------------------------------|-----------------------|
| Tests per day: SMBG                                                  | 5.60 (4.48 - 6.72)    |
| Cost of test strip: SMBG (£)                                         | 0.23 (0.18 - 0.28)    |
| No. of DKAs requiring admission per 1000 PYs: SMBG                   | 9.65 (7.72 - 11.58)   |
| No. of SHEs requiring admission per 1000 PYs: SMBG                   | 6.92 (5.53 - 8.30)    |
| No. of DKAs requiring admission per 1000 PYs: FreeStyle Libre System | 5.37 (4.29 - 6.44)    |
| No. of SHEs requiring admission per 1000 PYs: FreeStyle Libre System | 3.51 (2.81 - 4.21)    |
| Cost of DKA admission (£)                                            | 1,843 (1,474 - 2,211) |
| Cost of lancet: SMBG (£)                                             | 0.04 (0.03 - 0.05)    |
| Cost of hypoglycaemic admission (£)                                  | 2,118 (1,694 - 2,542) |
| Cost of ambulance call out (£)                                       | 243 (194 - 291)       |
| No. of SHEs requiring paramedic per 1000 PYs: SMBG                   | 13.08 (10.47 - 15.70) |
| Annual cost diff per % Hb1Ac decrease: 8% to 9% (£)                  | 51.5 (41.2 - 61.8)    |
| No. of SHEs requiring paramedic per 1000 PYs: FreeStyle Libre System | 2.34 (1.87 - 2.81)    |

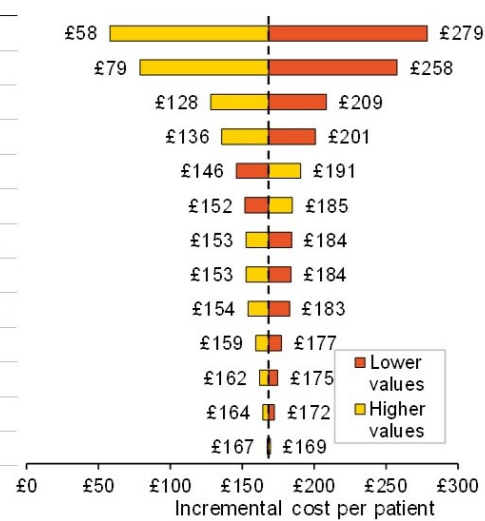

Supplement: bmjdrc-2021-002580supp002.pdf [file bmjdrc-2021-002580supp002.pdf]
